# Supplementary material for: Deep Learning using Convolutional LSTM estimates Biological Age from Physical Activity
Source: PubMed Central journal article supplement (PMC6684608; doi:10.1038/s41598-019-46850-0), 2019-08-06
Supplement: 41598_2019_46850_MOESM1_ESM.pdf [file 41598_2019_46850_MOESM1_ESM.pdf]

## Supplementary Materials of "Deep Learning using Convolutional LSTM estimates Biological Age from Physical Activity"

[1] Syed Ashiqur Rahman, [2\*] Donald A. Adjeroh

| N  | $\lambda = 0$ |             |       |             | $\lambda = 0.9$ |             |       |             |
|----|---------------|-------------|-------|-------------|-----------------|-------------|-------|-------------|
|    | SVM           |             | RF    |             | SVM             |             | RF    |             |
|    | mae           | correlation | mae   | correlation | mae             | correlation | mae   | correlation |
| 1  | 13.73         | 0.51        | 14.29 | 0.52        | 13.72           | 0.51        | 14.26 | 0.53        |
| 2  | 13.7          | 0.51        | 14.19 | 0.51        | 13.95           | 0.5         | 13.9  | 0.54        |
| 4  | 13.67         | 0.52        | 14.03 | 0.53        | 14.19           | 0.5         | 13.95 | 0.55        |
| 8  | 13.59         | 0.52        | 13.93 | 0.54        | 13.99           | 0.51        | 13.5  | 0.58        |
| 10 | 13.58         | 0.52        | 13.94 | 0.54        | 13.96           | 0.51        | 13.42 | 0.59        |
| 16 | 13.56         | 0.53        | 13.98 | 0.54        | 13.89           | 0.52        | 13.25 | 0.59        |
| 20 | 13.53         | 0.53        | 13.73 | 0.56        | 13.83           | 0.52        | 13.29 | 0.59        |
| 25 | 13.54         | 0.53        | 13.7  | 0.56        | 13.77           | 0.53        | 13.12 | 0.6         |
| 30 | 13.56         | 0.53        | 13.53 | 0.57        | 13.77           | 0.53        | 13.12 | 0.6         |
| 35 | 13.58         | 0.53        | 13.66 | 0.56        | 13.72           | 0.53        | 12.86 | 0.62        |
| 40 | 13.6          | 0.53        | 13.56 | 0.57        | 13.69           | 0.53        | 12.86 | 0.62        |

**Table S1.** Variations of window size for computing the moving averages after log-transformation.

| $\lambda$ | SVM   |             | RF    |             |
|-----------|-------|-------------|-------|-------------|
|           | mae   | correlation | mae   | correlation |
| 0.2       | 13.50 | 0.53        | 13.42 | 0.58        |
| 0.3       | 13.45 | 0.54        | 13.42 | 0.58        |
| 0.4       | 13.46 | 0.54        | 13.33 | 0.59        |
| 0.5       | 13.48 | 0.54        | 13.23 | 0.6         |
| 0.65      | 13.53 | 0.54        | 13.03 | 0.61        |
| 0.75      | 13.57 | 0.54        | 12.99 | 0.61        |
| 0.85      | 13.65 | 0.53        | 13.01 | 0.61        |
| 0.9       | 13.72 | 0.53        | 12.86 | 0.62        |
| 0.95      | 13.74 | 0.53        | 12.98 | 0.61        |
| 1.1       | 13.86 | 0.53        | 12.87 | 0.61        |

**Table S2.** Choosing  $\lambda$  parameters for the Box-Cox transformation.

|                               | Chi-Sq | p-value  |
|-------------------------------|--------|----------|
| 1D CNN                        | 42.98  | 2.49E-09 |
| DNN                           | 36.96  | 4.70E-08 |
| CNN+LSTM ( $\lambda = 0.9$ )  | 29.08  | 2.16E-06 |
| ConvLSTM* ( $\lambda = 1$ )   | 27.67  | 4.27E-06 |
| ConvLSTM* ( $\lambda = 0$ )   | 23.98  | 2.52E-05 |
| ConvLSTM* ( $\lambda = 0.9$ ) | 28.72  | 2.57E-06 |

**Table S3.** Results of the log-rank test applied on the gender and age cohort based normalized biological age acceleration group  $\eta$  using the estimated biological ages.

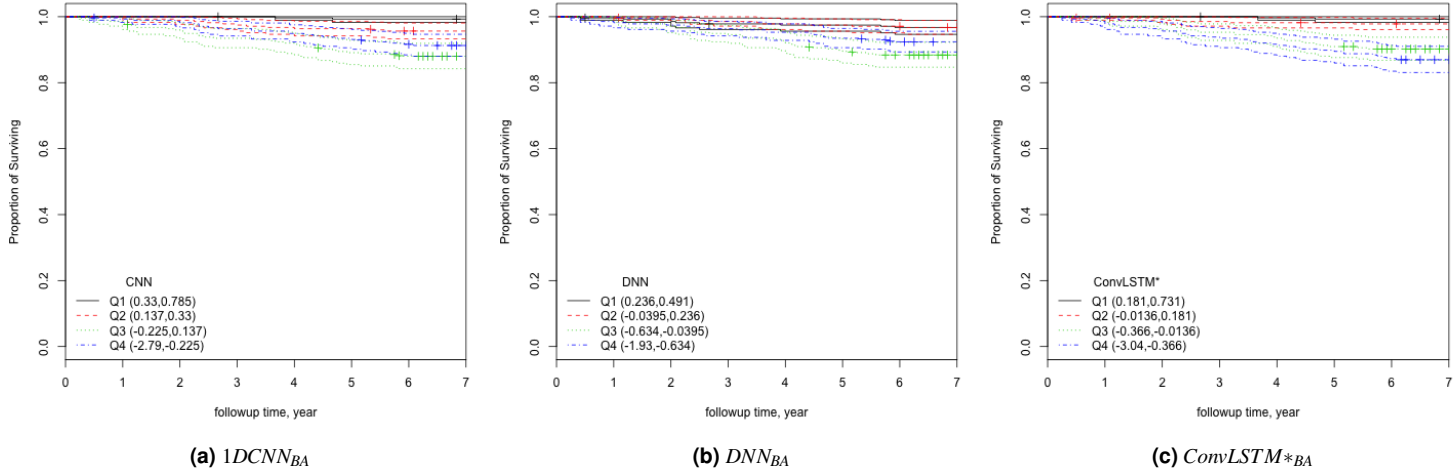

**Figure S1.** The Kaplan Meier curves with confidence intervals for estimated biological ages (BA) based on the physical activity applying  $\eta = \frac{CA-BA}{CA}$  estimated biological ages- (a) 1D CNN (b) DNN, and (c) ConvLSTM\*. Q1, Q2, Q3, and Q4 denote 1st, 2nd, 3rd, and 4th quartiles, respectively. The number of individuals in each Q is 276.

|                            | PA Avg | Age   | $\eta$ | $\eta_g$ |
|----------------------------|--------|-------|--------|----------|
| C-reactive protein         | -0.08  | 0.05  | 0.00   | -0.05    |
| Glycated hemoglobin        | -0.09  | 0.34  | 0.09   | -0.19    |
| Serum Albumin              | 0.17   | -0.09 | -0.01  | 0.10     |
| Total Cholesterol          | -0.03  | 0.18  | 0.11   | -0.22    |
| Serum Urea Nitrogen        | -0.06  | 0.46  | 0.12   | -0.22    |
| Serum Alkaline Phosphatase | -0.07  | 0.06  | -0.01  | -0.04    |
| Systolic blood pressure    | -0.11  | 0.53  | 0.11   | -0.31    |
| Diastolic blood pressure   | 0.05   | 0.10  | 0.07   | -0.14    |
| Pulse                      | -0.08  | -0.21 | -0.08  | 0.09     |
| High density lipoprotein   | -0.02  | -0.01 | 0.03   | -0.07    |
| Hemoglobin                 | 0.15   | -0.02 | -0.01  | 0.07     |
| Lymphocyte percent         | 0.06   | -0.07 | 0.01   | 0.03     |
| White blood cell count     | -0.07  | -0.05 | -0.04  | 0.02     |
| Hematocrit                 | 0.15   | -0.01 | -0.01  | 0.07     |
| Red blood cell count       | 0.15   | -0.13 | -0.04  | 0.15     |
| Platelet count             | -0.04  | -0.12 | -0.01  | 0.01     |

**Table S4.** Correlation between average physical activity, chronological age,  $\eta$ ,  $\eta_g$ , and the biomarkers.

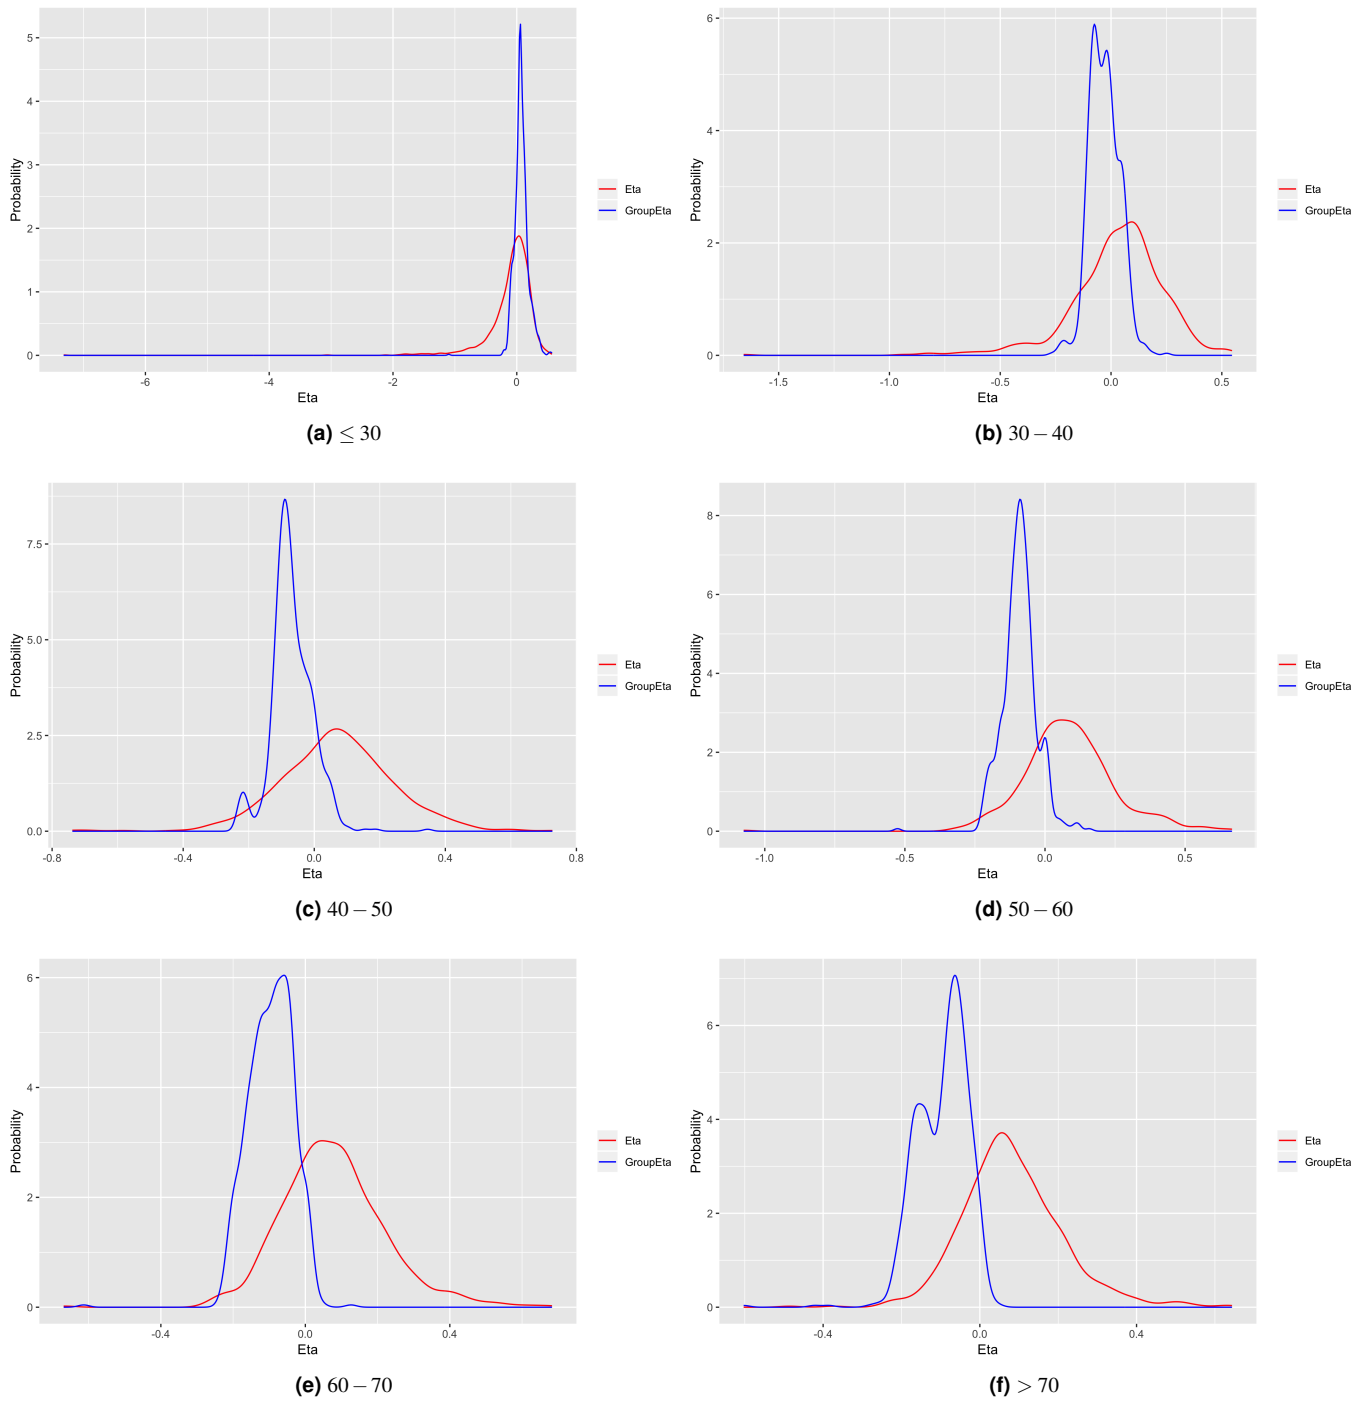

**Figure S2.** Distribution of different variations of age acceleration (namely  $\eta, \eta_g$ ) across age groups. We have grouped the subjects in different age categories ( $\leq 30, 30 - 40, 40 - 50, 50 - 60, 60 - 70, 70+$ ).

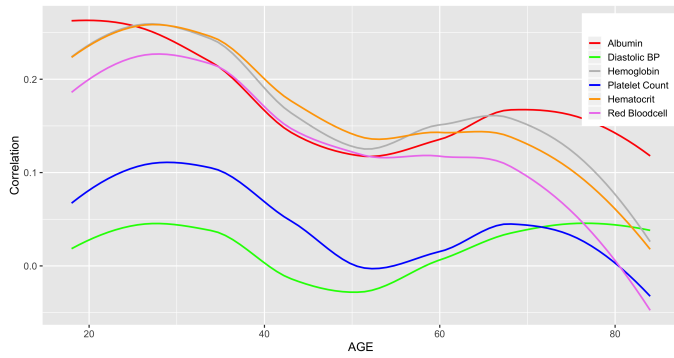

(a) Positively Correlated

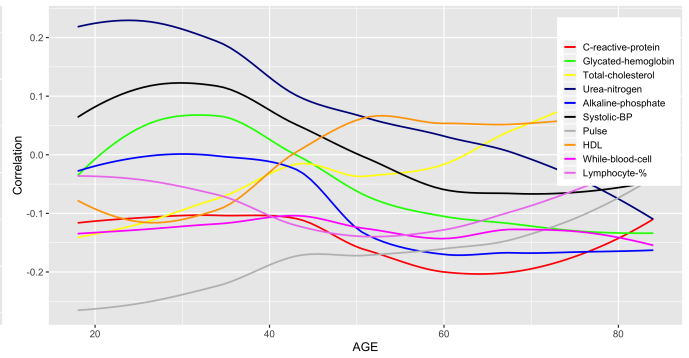

(b) Negatively Correlated

**Figure S3.** Correlation between average physical activity over age group with biomarkers. (a) biomarkers with predominantly positive correlation; (b) biomarkers with predominantly negative correlation.
